RESEARCH ARTICLE

# Pilot study on novel blood containers with alternative plasticizers for red cell concentrate storage

Yuki Morishita<sup>1</sup>\*, Yusuke Nomura<sup>1</sup>\*, Chie Fukui<sup>1</sup>, Tsuyoshi Kawakami<sup>2</sup>, Toshiyuki Ikeda<sup>3</sup>, Tomokazu Mukai<sup>4</sup>, Toshiyasu Yuba<sup>4</sup>, Ken-ichi Inamura<sup>4</sup>, Hisatoki Yamaoka<sup>4</sup>, Ken-ichi Miyazaki<sup>5</sup>, Hitoshi Okazaki<sup>3</sup>, Yuji Haishima<sup>1</sup>\*

**1** Division of Medical Devices, National Institute of Health Sciences, Setagaya, Tokyo, Japan, **2** Division of Environmental Chemistry, National Institute of Health Sciences, Setagaya, Tokyo, Japan, **3** Department of Transfusion Medicine, the University of Tokyo, Bunkyo, Tokyo, Japan, **4** Corporate Research and Development Division, Kawasumi Laboratories, Inc., Minato, Tokyo, Japan, **5** New Japan Chemical Co., Ltd., Chuo, Osaka, Japan

\* These authors contributed equally to this work.

\* [haishima@nihs.go.jp](mailto:haishima@nihs.go.jp)

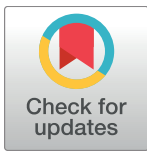

**OPEN ACCESS**

**Citation:** Morishita Y, Nomura Y, Fukui C, Kawakami T, Ikeda T, Mukai T, et al. (2017) Pilot study on novel blood containers with alternative plasticizers for red cell concentrate storage. PLoS ONE 12(9): e0185737. <https://doi.org/10.1371/journal.pone.0185737>

**Editor:** Hiroyoshi Ariga, Hokkaido Daigaku, JAPAN

**Received:** August 1, 2017

**Accepted:** September 18, 2017

**Published:** September 28, 2017

**Copyright:** © 2017 Morishita et al. This is an open access article distributed under the terms of the [Creative Commons Attribution License](https://creativecommons.org/licenses/by/4.0/), which permits unrestricted use, distribution, and reproduction in any medium, provided the original author and source are credited.

**Data Availability Statement:** All relevant data are within the paper and its Supporting Information files.

**Funding:** This study was supported by funding to YH from the Japanese Ministry of Health, Labor, and Welfare (<http://www.mhlw.go.jp/english/>); Health and Labor Sciences Research Grants (H25-CHIKYUKIBO-SHITEI-008 and H26-SOUYAKU-IPPAN-008), and from the Japan Agency for Medical Research and Development (<http://www.amed.go.jp/en/>); a grant for Research on Development of New Drugs (15ak0101029h2602,

## Abstract

Di (2-ethylhexyl) phthalate (DEHP), a typical plasticizer used for polyvinyl chloride (PVC) blood containers, is eluted from the blood containers and exerts protective effects on red blood cells. However, a concern for detrimental effects of DEHP on human health has led to the development of potential DEHP substitutes. Here, we compared the red blood cell preservation ability of two types of non-DEHP blood containers with safe alternative plasticizers to that of DEHP blood containers. Red cell concentrates in mannitol-adenine-phosphate solution (MAP/RCC) were stored for 6 weeks in PVC blood bags containing DEHP, diisononyl-cyclohexane-1,2-dicarboxylate (DINCH) and di (2-ethylhexyl) 4-cyclohexene-1,2-dicarboxylate (DOTH), or 4-cyclohexene-1,2-dicarboxylic acid dinonyl ester (DL9TH) and DOTH. There was no significant difference in the total amount of plasticizer eluted into MAP/RCC (till 3 weeks from the beginning of the experiment), hemolysis of MAP/RCC, and osmotic fragility of MAP/RCC between the non-DEHP blood containers and DEHP blood containers. Hematological and blood chemical indices of MAP/RCC in all containers were nearly the same. Thus, DOTH/DINCH and DOTH/DL9TH blood containers demonstrate the same quality of MAP/RCC storing as the DEHP blood containers. Since DOTH, DINCH, and DL9TH were reported to be safe, DOTH/DINCH and DOTH/DL9TH blood containers are promising candidate substitutes for DEHP blood containers.

## Introduction

Polyvinylchloride (PVC) has been widely used for the construction of medical devices, including blood containers, due to its durability and chemical inertness [1]. As it is inflexible, to produce medical devices, the use of plasticizers is required. Di (2-ethylhexyl) phthalate (DEHP)

16ak0101029/2603). The funders had no role in study design, data collection and analysis, decision to publish, or preparation of the manuscript. Kawasumi Laboratories, Inc and New Japan Chemical Co., Ltd. are commercial companies. The companies did not provide research funds for this study. The companies provided salaries for authors [employees of the companies: TM, TY, KI, HY, and KM]. The specific roles of these authors are articulated in the 'Author Contributions' section.

**Competing interests:** I have read the journal's policy and the authors of this manuscript have the following competing interests: SANSO CIZER DOTH and DL9TH are marketed products developed by New Japan Chemical Co., Ltd (patent publication numbers: WO2015147300A for the Patent Cooperation Treaty; P2016-006145A, P2016-141712A, and P2016-150966A in Japan; and 201542639A in Taiwan). KM is employed by New Japan Chemical Co., Ltd. Blood bags containing DOTH, DINCH, and DL9TH are products in development by Kawasumi Laboratories, Inc. (patent application numbers: PCT/JP2016/052018 for the Patent Cooperation Treaty, P2013-104082 and P2015-17514 in Japan, and 105102824 in Taiwan). TM, TY, KI, and HY are employed by Kawasumi Laboratories, Inc. These competing interests do not alter our adherence to PLOS ONE policies on sharing data and materials. All other authors declare no conflict of interests.

has been a typical plasticizer used for PVC-made medical devices [2, 3]. However, DEHP exhibits reproductive and developmental toxicity in rodents [4–7], while some studies reported the effects on human reproductive health [8, 9]. Therefore, concerns regarding the safety of DEHP led to stricter regulation of DEHP use in PVC products [10, 11] and the substitution of DEHP with alternative plasticizers [12, 13]. However, DEHP is eluted from the blood containers and it exerts beneficial effects on the storing of red blood cells, such as the decrease in hemolysis and increase in post-transfusion survival [14]. Because of this, the use of PVC blood bags containing DEHP has been permitted even in countries that are active for DEHP ban, such as Europe and Japan. Therefore, for the use in blood bags, alternative plasticizers should not only be safer, but also have protective effects on red blood cells comparable to those of DEHP.

Development and identification of suitable plasticizers for blood containers has been attempted previously. For example, we demonstrated that di (2-ethylhexyl) 4-cyclohexene-1,2-dicarboxylate (DOH), diisodecyl phthalate, and di-isononyl-cyclohexane-1,2-dicarboxylate (DINCH, BASF SE, Germany) exhibit protective effects on red blood cells [15]. DINCH is one of the promising alternative plasticizers for PVC-made blood containers that has been commercially used [1], but with AS-1 as an additive solution, DINCH-PVC blood containers were reported to be inferior to DEHP-PVC blood containers for the prevention of hemolysis without mixing during storage [16]. DINCH elution into the blood product was shown to be significantly reduced, compared with that of DEHP, and during storage in saline-adenine-glucose-mannitol (SAGM) solution, the use of DINCH-based blood containers resulted in increased hemolysis compared with that observed in DEHP-based blood containers, although DINCH-based blood containers performed equivalently to DEHP-based containers with some alternative additive solutions [17]. Therefore, further improvement of blood containers with low toxicity and DEHP-equivalent protective effects on red blood cells should be achieved.

We recently reported that the concurrent use of DOH and DINCH enabled the production of a safe PVC sheet with protective effects on red blood cells, which was comparable to that of DEHP [18]. Additionally, using a novel plasticizer, 4-cyclohexene-1,2-dicarboxylic acid dinonyl ester (DL9TH), we developed a PVC sheet for blood containers with comparable protective effects on red blood cells and improved cold resistance, compared to the characteristics of DEHP-PVC sheet [19]. Here, we compared the potential for red blood cell preservation in the DOH/DINCH- and DOH/DL9TH-PVC blood containers, and that in the DEHP blood containers.

## Materials and methods

### Ethics review

Experiments in this study were approved by the Ethics Committees of Kawasumi Laboratories, INC., The University of Tokyo Hospital, and National Institute of Health Sciences (approval numbers F6000, 11283, and 637–2, respectively). The procedure was performed in accordance with the ethical standards of the committees on human experimentation of Kawasumi Laboratories, INC., The University of Tokyo Hospital, and National Institute of Health Sciences. Written informed consents were obtained from all enrolled subjects.

### Materials

Two types of SANSO CIZER (DL9TH, Chemical Abstracts Service [CAS] number 1609185-22-9; and DOH, CAS number 2915-49-3) were synthesized by New Japan Chemical Co., Ltd. (Osaka, Japan). Epoxidized soybean oil was purchased from Tokyo Chemical Industry Co., Ltd. (Tokyo, Japan). DINCH (CAS number 166412-78-8) was provided by BASF

(Ludwigshafen, Germany), while DEHP (CAS number 117-81-7), DEHP-d4, diethyl ether of pesticide residue analysis grade, and phthalate-analytical-grade hexane were purchased from Kanto Chemical Co. (Tokyo, Japan). Sodium chloride from pesticide residue analysis grade, phthalate-analytical-grade anhydrous sodium sulfate (Wako Pure Chemical Industries, Ltd., Tokyo, Japan), and ultrapure water obtained using a Milli-Q Synthesis A10 system (Millipore, Tokyo, Japan) were used to prepare samples for gas chromatography/tandem mass spectrometry (GC-MS/MS) analysis. Other chemicals were purchased from Wako Pure Chemical Industries. Prior to use, all tools made of glass, metal, or Teflon were heated to 250°C for more than 16 h.

### Preparation of blood containers

T-die molded PVC (degree of polymerization = 1,700) quadruple blood bag systems containing plasticizers (DEHP [55 parts to 100 parts PVC, w/w], DOTH/DINCH mixtures [25:33 parts to 100 parts PVC, w/w], or DOTH/DL9TH mixtures [25:33 parts to 100 parts PVC, w/w]), epoxidized soybean oil (8 parts to 100 parts PVC, w/w), and other additives were made according to a standard procedure of Kawasumi Laboratories, Inc. (Tokyo, Japan). The content of plasticizers in the blood bag systems was adjusted to obtain a plasticizing efficiency equivalent to that of the DEHP-containing blood bag systems.

### Whole blood collection and processing

Whole blood (400 mL) donated by 18 healthy volunteers was collected into DEHP-, DOTH/DINCH-, or DOTH/DL9TH-blood bag systems ( $n = 6$ , each) at The University of Tokyo Hospital. During collection, whole blood was mixed with 60 mL citrate-phosphate-dextrose solution. Whole blood samples were centrifuged ( $4200 \times g$ , 4°C, 8 min, slow deceleration) and plasma was separated. After separation of the buffy coat, 95 mL of mannitol-adenine-phosphate (MAP) solution (D-mannitol [14.57 g/L], adenine [0.14 g/L], sodium dihydrogen phosphate [0.94 g/L], sodium citrate hydrate [1.5 g/L], citric acid hydrate [0.2 g/L], glucose [7.21 g/L], and sodium chloride [4.97 g/L]) was added to the remaining red cell concentrates (RCCs) to prepare MAP/RCC. MAP/RCC was shipped at 4°C to the National Institute of Health Sciences for testing. MAP/RCC yield did not significantly differ between the analyzed blood containers (DEHP blood container,  $277 \pm 24$  g; DOTH/DINCH blood container,  $268 \pm 16$  g; and DOTH/DL9TH blood container,  $276 \pm 15$  g).

### Sampling and storage

After mild mixing, MAP/RCC (7 mL) was collected under sterile conditions without air contact for testing at day 1 or 2 after processing, and thereafter weekly. MAP/RCC was stored at 4°C for 6 weeks.

### Plasticizer elution test

Plasticizer levels in MAP/RCC (after 0, 1, 2, 3, 4, 5, and 6 weeks of storage;  $n = 6$ ) were determined using a previously described protocol, with some modifications [15, 19–23]. Briefly, aliquot (50  $\mu$ L) of MAP/RCC was collected into screw-capped glass tubes, and sodium chloride (1 mL, 1 w/v%), DEHP-d4 (0.5  $\mu$ g), and hexane (1 mL) were added. After vigorous shaking for 15 min and centrifuging at 3,000 rpm for 10 min at room temperature, the organic phase was collected and dehydrated with anhydrous sodium sulfate. Subsequently, the sample was analyzed by GC-MS/MS, which included an analysis of precision that was performed as described previously [15]. The retention times, the precursor (Q1) and product (Q2) ions of the

plasticizers, and the collision energies of each plasticizer are presented in [S1 Table](#). The productions of all plasticizers were used for quantification, which was performed with DEHP-d4 as the internal standard. The concentrations of DINCH were determined using the sum of the total peak area of its isomers, as in a previous study [24]. The limits of detection and quantification (LOD and LOQ, respectively) were calculated using total optimization of chemical operations (TOCO) software version 2.0 and the function of mutual information (FUMI) theory [20]. The concentrations obtained using relative standard deviations of 33% and 10% based on the mass chromatograms of the standard and blank solutions, respectively, were used as the instrumental LOD and LOQ.

### Hemolysis test

The hemolysis test was performed after 0, 1, 2, 3, 4, 5, and 6 weeks of storage ( $n = 6$ ), as described previously [19]. Briefly, an aliquot (50  $\mu\text{L}$ ) of MAP/RCC was collected into Eppendorf tubes (Eppendorf, Tokyo, Japan). Phosphate-buffered saline (1 mL) was added to each sample and gently mixed, followed by centrifugation at  $425 \times g$  for 2 min at  $4^\circ\text{C}$ . Afterwards, the absorbance of the supernatant (100  $\mu\text{L}$ ) was measured at 415 nm with a SH-9000 Lab microplate reader (Corona Electric Co. Ltd., Ibaraki, Japan). Positive controls were prepared by adding distilled water instead of phosphate-buffered saline to the samples. The hemolytic ratio was calculated using the following formula: % hemolysis =  $100 \times \text{AT}/\text{AP}$ , where AT is the test sample absorbance and AP represents the average absorbance of the positive control.

### Osmotic fragility test

The osmotic fragility test was performed after 0, 3, and 6 weeks of storage ( $n = 6$ ). Aliquots (10  $\mu\text{L}$ ) of MAP/RCC were collected into Eppendorf tubes. Serial dilutions of buffered salt solution (0.25, 0.35, 0.45, 0.55, 0.65, 0.75, 0.85, and 1.2% NaCl; 1 mL) were added to the samples and gently mixed. The mixtures were allowed to incubate for 30 min at  $20^\circ\text{C}$  and centrifuged at  $425 \times g$  for 5 min. The absorbance of the supernatant (100  $\mu\text{L}$ ) was measured at 415 nm with a SH-9000 Lab microplate reader. Positive controls were prepared by adding distilled water instead of salt solution to the samples. The hemolytic ratio was calculated using the same formula as previously described.

### Hematological and blood chemical analyses

Hematological and blood chemical analyses of MAP/RCC (after 0, 1, 2, 3, 4, 5, and 6 weeks of storage;  $n = 6$ ) were performed as follows. Concentration of adenosine triphosphate (ATP) and 2,3-diphosphoglycerate (2,3-DPG) were measured using ATP ASSAY kit for Blood (TOYO B-Net CO., LTD., Tokyo, Japan) and 2,3-DPG kit (Roche, Tokyo, Japan), respectively. Other hematological and blood chemical indices were measured by FALCO Biosystems Ltd. (Kyoto, Japan): red blood cell count was measured by the sheath flow DC detection method; hemoglobin levels were determined using the sodium lauryl sulfate hemoglobin method; hematocrit was measured by red blood cell pulse height detection method; mean corpuscular volume (MCV), mean corpuscular hemoglobin (MCH), and mean corpuscular hemoglobin concentration (MCHC) were calculated; total protein levels were measured by performing the biuret test; albumin levels were measured using the bromocresol purple method; the albumin/globulin ratio was calculated; glucose levels were determined by the hexokinase-glucose-6-phosphate dehydrogenase method; ammonia was measured by the modified Fujii-Okuda method; calcium was measured by the arsenazo III method; inorganic phosphorus levels were determined by the molybdc acid method; magnesium levels were measured by the Xylidyl Blue method; sodium, chloride, and potassium levels were measured by the electrode method.

## Statistical analysis

Data were analyzed by one-way analysis of variance (ANOVA) or two-way repeated measures ANOVA. A post hoc Tukey-Kramer test was performed on all ANOVA results that were shown to be significant.

## Results

### Plasticizer elution from blood containers

To examine the exposure to plasticizers, the amount of plasticizers eluted from blood containers into MAP/RCC (Table 1) was quantified. The quantities of plasticizer eluted from blood containers were shown to increase in a time-dependent manner for all plasticizers. Significant differences were found between the three types of blood containers using two-way repeated measures ANOVA (0–6 week). One-way ANOVA analysis followed by post hoc Tukey-Kramer test for values obtained each week demonstrated that the total amount of plasticizer eluted from the DOTH/DL9TH blood container was not significantly different compared with that eluted from the DEHP blood container, but the levels determined in the DOTH/DINCH group were significantly higher than those of the DEHP group at 4–6 weeks.

### Hemolysis of stored MAP/RCC

The hemolytic ratio of MAP/RCC did not significantly differ between the blood containers (Fig 1). The average hemolytic ratios at 6 weeks observed in the DEHP, DOTH/DINCH, and DOTH/DL9TH groups were 0.59, 0.69, and 0.76%, respectively.

### Osmotic fragility test

In the osmotic fragility test (Fig 2), no considerable hemolysis was observed in 1.2, 0.85, 0.75, and 0.65% NaCl solutions, in all samples. In 0.55% NaCl, slight hemolysis was observed with the progression of storage time, while in 0.45, 0.35, and 0.25% NaCl solutions, considerable rate of hemolysis was observed, regardless of the storage period. The hemolytic ratio did not differ significantly between the blood containers.

### Hematological and blood chemical analyses

In hematological and blood chemical analyses of MAP/RCC (Table 2), significant differences were found between blood containers in MCV and MCH using two-way repeated measures

**Table 1. Amount of plasticizer eluted from blood containers into MAP/RCC (µg/mL).**

| Blood containers | Measured plasticizers | 0 week                   | 1 week     | 2 week     | 3 week     | 4 week                 | 5 week                 | 6 week                 |
|------------------|-----------------------|--------------------------|------------|------------|------------|------------------------|------------------------|------------------------|
| DEHP             | DEHP                  | 2.6 ± 0.72 <sup>1)</sup> | 9.6 ± 4.6  | 12 ± 2.2   | 16 ± 2.6   | 17 ± 3.4               | 18 ± 4.8               | 22 ± 4.4               |
| DOTH/DINCH       | DOTH                  | 2.2 ± 0.19               | 9.1 ± 3.9  | 12 ± 1.2   | 15 ± 2.5   | 18 ± 2.8               | 22 ± 6.4               | 26 ± 4.9               |
|                  | DINCH                 | 0.34 ± 0.01              | 1.8 ± 0.80 | 2.7 ± 0.18 | 3.9 ± 0.74 | 5.4 ± 0.44             | 7.0 ± 1.8              | 9.1 ± 1.8              |
|                  | DOTH + DINCH          | 2.5 ± 0.20               | 11 ± 4.7   | 15 ± 1.3   | 19 ± 3.2   | 23 ± 3.2 <sup>2)</sup> | 29 ± 8.2 <sup>2)</sup> | 35 ± 6.6 <sup>3)</sup> |
| DOTH/DL9TH       | DOTH                  | 2.5 ± 1.3                | 7.0 ± 2.6  | 8.9 ± 0.79 | 12 ± 2.3   | 16 ± 1.8               | 18 ± 2.1               | 21 ± 2.9               |
|                  | DL9TH                 | 0.43 ± 0.25              | 1.4 ± 0.62 | 2.1 ± 0.20 | 3.2 ± 0.72 | 4.4 ± 0.54             | 5.7 ± 0.77             | 6.9 ± 1.6              |
|                  | DOTH + DL9TH          | 3.1 ± 1.5                | 7.3 ± 3.3  | 11 ± 0.87  | 16 ± 3.0   | 20 ± 2.1               | 23 ± 2.7               | 28 ± 4.2               |

<sup>1)</sup>Data are reported as mean ± SD (n = 6);

<sup>2)</sup>p < 0.05 vs. the DEHP group;

<sup>3)</sup>p < 0.01 vs. the DEHP group

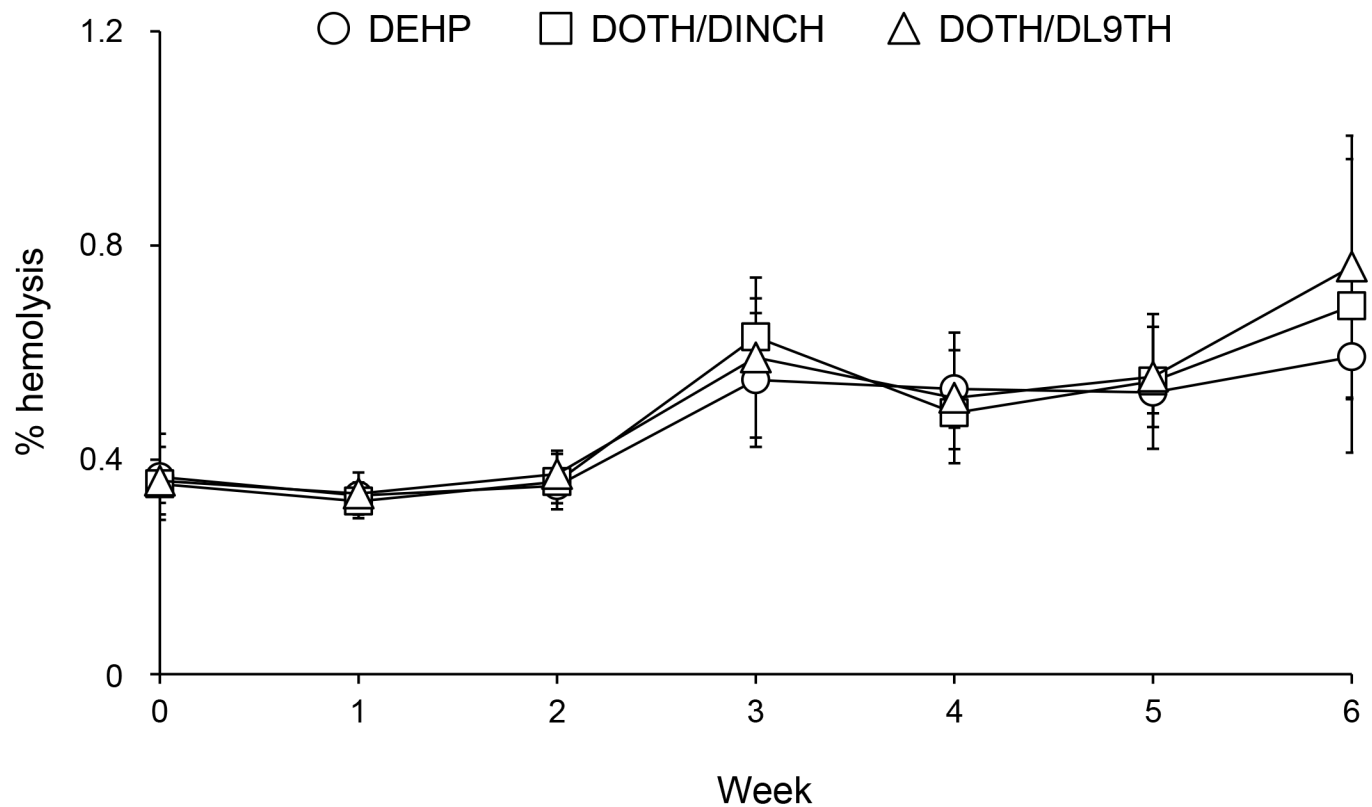

**Fig 1. Hemolysis of stored MAP/RCC.** Data are reported as mean  $\pm$  standard deviation (SD; n = 6).

<https://doi.org/10.1371/journal.pone.0185737.g001>

ANOVA (0–6 weeks). These indices were higher in the DEHP group than in the other groups, although no significant differences were observed between groups by one-way ANOVA analysis of values obtained each week. The values were within the physiological range in all groups. Other than in MCV and MCH, no significant differences in hematological and blood chemical indices were observed by two-way repeated measures ANOVA analysis. However, one-way ANOVA analysis followed by a post hoc Tukey-Kramer test demonstrated that albumin, albumin/globulin ratio, and sodium levels were significantly higher in the DOTH/DINCH group than in the DEHP group at 6 weeks and that phosphorus level was significantly lower in the DOTH/DINCH and DOTH/DL9TH groups than in the DEHP group at 6 weeks.

## Discussion

In the present study, red blood cell preservation ability of DOTH/DINCH- and DOTH/DL9TH-blood containers was compared to that of DEHP-blood containers.

In the plasticizer elution test, the total amount of plasticizer eluted into MAP/RCC from the DOTH/DINCH and DOTH/DL9TH blood containers did not significantly differ compared with that eluted from the DEHP blood container during the first 3 weeks. In Japan, where MAP solution is used as an additive, the expiration date of stored MAP/RCC is 21 days after processing. Therefore, the DOTH/DINCH and DOTH/DL9TH blood container use is comparable to that of the DEHP blood container. Although the total amount of plasticizer eluted into MAP/RCC from the DOTH/DINCH blood container was significantly higher compared with that eluted from the DEHP blood container during the following 3 weeks, these levels were

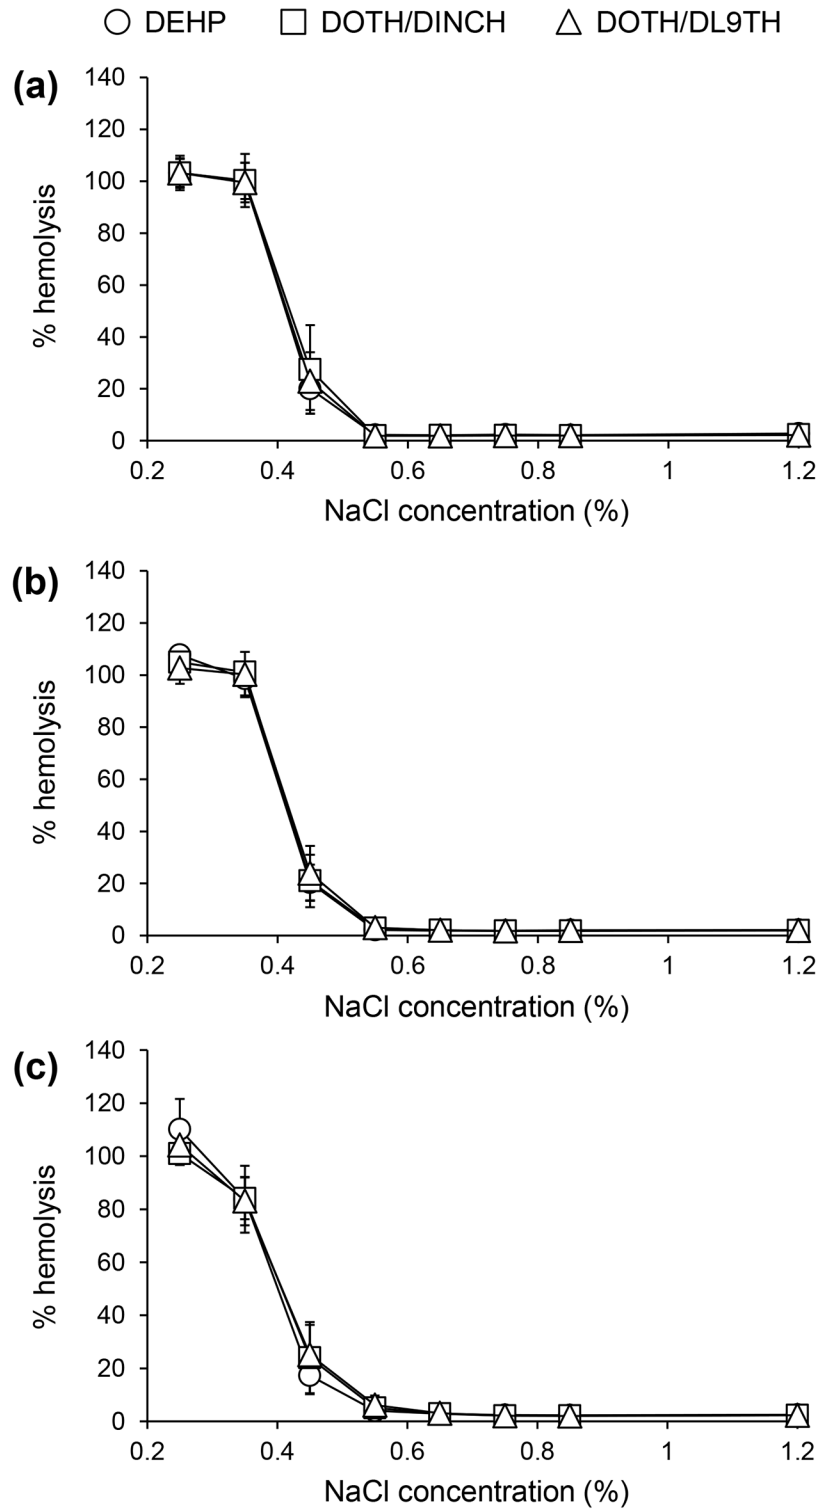

**Fig 2. Osmotic fragility test of stored MAP/RCC.** Hemolysis rate of MAP/RCC after 0 (a), 3 (b), and 6 weeks of storage (c) are shown. Data are reported as mean  $\pm$  SD (n = 6).

<https://doi.org/10.1371/journal.pone.0185737.g002>

**Table 2. Hematological and blood chemical analyses of MAP/RCC.**

| Indices                                            | Blood containers | 0 week                     | 1 week          | 2 week          | 3 week          | 4 week          | 5 week           | 6 week                        |
|----------------------------------------------------|------------------|----------------------------|-----------------|-----------------|-----------------|-----------------|------------------|-------------------------------|
| Red blood cell count ( $\times 10^4/\mu\text{L}$ ) | DEHP             | 650 $\pm$ 41 <sup>1)</sup> | 740 $\pm$ 24    | 730 $\pm$ 91    | 740 $\pm$ 54    | 740 $\pm$ 85    | 700 $\pm$ 75     | 690 $\pm$ 71                  |
|                                                    | DOTH/DINCH       | 660 $\pm$ 36               | 760 $\pm$ 64    | 750 $\pm$ 90    | 730 $\pm$ 61    | 730 $\pm$ 130   | 720 $\pm$ 86     | 670 $\pm$ 59                  |
|                                                    | DOTH/DL9TH       | 690 $\pm$ 46               | 770 $\pm$ 45    | 790 $\pm$ 46    | 780 $\pm$ 55    | 770 $\pm$ 52    | 750 $\pm$ 80     | 700 $\pm$ 20                  |
| Hemoglobin (g/dL)                                  | DEHP             | 21 $\pm$ 1.0               | 24 $\pm$ 1.2    | 23 $\pm$ 2.9    | 24 $\pm$ 1.4    | 23 $\pm$ 2.2    | 22 $\pm$ 1.1     | 22 $\pm$ 2.2                  |
|                                                    | DOTH/DINCH       | 20 $\pm$ 1.0               | 24 $\pm$ 2.1    | 24 $\pm$ 2.3    | 23 $\pm$ 2.2    | 23 $\pm$ 3.1    | 22 $\pm$ 2.5     | 21 $\pm$ 1.5                  |
|                                                    | DOTH/DL9TH       | 21 $\pm$ 1.6               | 24 $\pm$ 1.4    | 25 $\pm$ 1.7    | 24 $\pm$ 1.9    | 24 $\pm$ 1.9    | 23 $\pm$ 2.1     | 21 $\pm$ 0.89                 |
| Hematocrit (%)                                     | DEHP             | 59 $\pm$ 1.9               | 69 $\pm$ 2.9    | 69 $\pm$ 7.5    | 72 $\pm$ 5.5    | 69 $\pm$ 7.2    | 65 $\pm$ 7.9     | 66 $\pm$ 6.5                  |
|                                                    | DOTH/DINCH       | 59 $\pm$ 1.9               | 70 $\pm$ 4.6    | 69 $\pm$ 5.6    | 67 $\pm$ 3.9    | 68 $\pm$ 8.8    | 67 $\pm$ 6.2     | 63 $\pm$ 3.9                  |
|                                                    | DOTH/DL9TH       | 60 $\pm$ 3.7               | 68 $\pm$ 3.7    | 71 $\pm$ 4.4    | 71 $\pm$ 5.6    | 70 $\pm$ 4.7    | 69 $\pm$ 9.3     | 64 $\pm$ 2.9                  |
| MCV (fL)                                           | DEHP             | 92 $\pm$ 4.8               | 94 $\pm$ 4.0    | 95 $\pm$ 5.6    | 96 $\pm$ 4.8    | 94 $\pm$ 5.2    | 94 $\pm$ 6.4     | 95 $\pm$ 5.6                  |
|                                                    | DOTH/DINCH       | 90 $\pm$ 3.8               | 92 $\pm$ 3.9    | 92 $\pm$ 5.0    | 93 $\pm$ 4.3    | 93 $\pm$ 5.7    | 94 $\pm$ 5.3     | 94 $\pm$ 4.7                  |
|                                                    | DOTH/DL9TH       | 88 $\pm$ 3.1               | 89 $\pm$ 3.5    | 90 $\pm$ 3.7    | 91 $\pm$ 4.0    | 91 $\pm$ 3.3    | 92 $\pm$ 5.0     | 92 $\pm$ 5.1                  |
| MCH (pg)                                           | DEHP             | 32 $\pm$ 1.8               | 32 $\pm$ 1.6    | 32 $\pm$ 2.1    | 32 $\pm$ 1.7    | 32 $\pm$ 1.8    | 32 $\pm$ 1.9     | 32 $\pm$ 1.6                  |
|                                                    | DOTH/DINCH       | 31 $\pm$ 1.1               | 31 $\pm$ 0.96   | 31 $\pm$ 1.2    | 31 $\pm$ 1.1    | 31 $\pm$ 1.4    | 31 $\pm$ 1.1     | 31 $\pm$ 1.0                  |
|                                                    | DOTH/DL9TH       | 31 $\pm$ 1.5               | 31 $\pm$ 1.4    | 31 $\pm$ 1.5    | 31 $\pm$ 1.4    | 31 $\pm$ 1.3    | 31 $\pm$ 1.7     | 31 $\pm$ 1.4                  |
| MCHC (%)                                           | DEHP             | 35 $\pm$ 0.97              | 34 $\pm$ 0.55   | 34 $\pm$ 0.76   | 33 $\pm$ 1.4    | 34 $\pm$ 0.51   | 34 $\pm$ 0.57    | 34 $\pm$ 0.56                 |
|                                                    | DOTH/DINCH       | 35 $\pm$ 0.78              | 34 $\pm$ 1.0    | 34 $\pm$ 0.75   | 34 $\pm$ 0.81   | 34 $\pm$ 0.76   | 33 $\pm$ 0.94    | 33 $\pm$ 0.76                 |
|                                                    | DOTH/DL9TH       | 35 $\pm$ 0.81              | 35 $\pm$ 0.46   | 35 $\pm$ 0.29   | 34 $\pm$ 0.75   | 34 $\pm$ 0.57   | 34 $\pm$ 0.37    | 33 $\pm$ 0.68                 |
| Total protein (mg/dL)                              | DEHP             | 750 $\pm$ 250              | 750 $\pm$ 290   | 600 $\pm$ 140   | 780 $\pm$ 190   | 720 $\pm$ 260   | 750 $\pm$ 380    | 630 $\pm$ 120                 |
|                                                    | DOTH/DINCH       | 650 $\pm$ 190              | 830 $\pm$ 350   | 680 $\pm$ 170   | 750 $\pm$ 210   | 820 $\pm$ 390   | 770 $\pm$ 290    | 670 $\pm$ 100                 |
|                                                    | DOTH/DL9TH       | 630 $\pm$ 160              | 600 $\pm$ 170   | 770 $\pm$ 320   | 880 $\pm$ 550   | 750 $\pm$ 180   | 770 $\pm$ 360    | 670 $\pm$ 120                 |
| Albumin (mg/dL)                                    | DEHP             | 300 $\pm$ 110              | 300 $\pm$ 60    | 270 $\pm$ 50    | 280 $\pm$ 80    | 250 $\pm$ 100   | 250 $\pm$ 80     | 200 $\pm$ 60                  |
|                                                    | DOTH/DINCH       | 330 $\pm$ 100              | 300 $\pm$ 130   | 280 $\pm$ 40    | 300 $\pm$ 130   | 320 $\pm$ 150   | 280 $\pm$ 80     | 300 $\pm$ 60 <sup>2)</sup>    |
|                                                    | DOTH/DL9TH       | 320 $\pm$ 40               | 280 $\pm$ 40    | 270 $\pm$ 80    | 300 $\pm$ 60    | 300 $\pm$ 60    | 270 $\pm$ 80     | 230 $\pm$ 50                  |
| Albumin/ globulin ratio                            | DEHP             | 0.68 $\pm$ 0.12            | 0.87 $\pm$ 0.48 | 0.85 $\pm$ 0.18 | 0.63 $\pm$ 0.27 | 0.63 $\pm$ 0.44 | 0.60 $\pm$ 0.24  | 0.47 $\pm$ 0.18               |
|                                                    | DOTH/DINCH       | 1.4 $\pm$ 0.88             | 0.62 $\pm$ 0.26 | 0.78 $\pm$ 0.20 | 0.67 $\pm$ 0.29 | 0.72 $\pm$ 0.23 | 0.63 $\pm$ 0.14  | 0.85 $\pm$ 0.23 <sup>2)</sup> |
|                                                    | DOTH/DL9TH       | 1.3 $\pm$ 0.88             | 1.3 $\pm$ 0.94  | 0.60 $\pm$ 0.19 | 0.70 $\pm$ 0.28 | 0.78 $\pm$ 0.40 | 0.67 $\pm$ 0.42  | 0.60 $\pm$ 0.25               |
| ATP ( $\mu\text{mol/g Hb}$ )                       | DEHP             | 4.3 $\pm$ 0.48             | 5.2 $\pm$ 0.77  | 4.5 $\pm$ 0.55  | 4.1 $\pm$ 0.71  | 3.6 $\pm$ 0.62  | 2.6 $\pm$ 0.85   | 2.1 $\pm$ 0.59                |
|                                                    | DOTH/DINCH       | 4.2 $\pm$ 0.39             | 4.8 $\pm$ 0.53  | 4.3 $\pm$ 0.29  | 4.1 $\pm$ 0.73  | 3.6 $\pm$ 0.41  | 2.6 $\pm$ 0.67   | 2.1 $\pm$ 0.47                |
|                                                    | DOTH/DL9TH       | 4.4 $\pm$ 0.74             | 4.7 $\pm$ 0.66  | 4.7 $\pm$ 0.44  | 4.5 $\pm$ 0.58  | 4.1 $\pm$ 0.49  | 3.1 $\pm$ 0.49   | 2.6 $\pm$ 0.62                |
| 2,3-DPG ( $\mu\text{mol/g Hb}$ )                   | DEHP             | 42 $\pm$ 13                | 17 $\pm$ 12     | 1.4 $\pm$ 2.4   | 1.2 $\pm$ 1.9   | 0.38 $\pm$ 0.67 | nd <sup>4)</sup> | 1.5 $\pm$ 1.3                 |
|                                                    | DOTH/DINCH       | 35 $\pm$ 8.6               | 14 $\pm$ 9.1    | 0.95 $\pm$ 2.2  | 1.3 $\pm$ 2.1   | 0.61 $\pm$ 1.0  | 0.91 $\pm$ 1.5   | 1.4 $\pm$ 2.1                 |
|                                                    | DOTH/DL9TH       | 34 $\pm$ 7.8               | 19 $\pm$ 14     | 4.7 $\pm$ 4.8   | nd              | 1.1 $\pm$ 2.7   | 0.71 $\pm$ 1.1   | 1.9 $\pm$ 1.8                 |
| Glucose (mg/dL)                                    | DEHP             | 500 $\pm$ 21               | 420 $\pm$ 32    | 330 $\pm$ 46    | 230 $\pm$ 93    | 230 $\pm$ 54    | 200 $\pm$ 49     | 180 $\pm$ 53                  |
|                                                    | DOTH/DINCH       | 490 $\pm$ 18               | 410 $\pm$ 24    | 320 $\pm$ 36    | 280 $\pm$ 48    | 200 $\pm$ 88    | 160 $\pm$ 71     | 160 $\pm$ 56                  |
|                                                    | DOTH/DL9TH       | 490 $\pm$ 24               | 400 $\pm$ 27    | 310 $\pm$ 32    | 240 $\pm$ 44    | 150 $\pm$ 60    | 141 $\pm$ 63     | 120 $\pm$ 54                  |
| Ammonia ( $\mu\text{g/dL}$ )                       | DEHP             | 92 $\pm$ 11                | 190 $\pm$ 24    | 320 $\pm$ 33    | 460 $\pm$ 100   | 650 $\pm$ 140   | 790 $\pm$ 110    | 1200 $\pm$ 100                |
|                                                    | DOTH/DINCH       | 93 $\pm$ 15                | 200 $\pm$ 30    | 340 $\pm$ 50    | 480 $\pm$ 110   | 670 $\pm$ 160   | 830 $\pm$ 180    | 1200 $\pm$ 200                |
|                                                    | DOTH/DL9TH       | 95 $\pm$ 19                | 200 $\pm$ 25    | 300 $\pm$ 38    | 430 $\pm$ 86    | 600 $\pm$ 180   | 700 $\pm$ 100    | 1100 $\pm$ 170                |
| Sodium (mEq/L)                                     | DEHP             | 110 $\pm$ 1.4              | 100 $\pm$ 2.6   | 100 $\pm$ 3.6   | 98 $\pm$ 7.0    | 92 $\pm$ 4.9    | 91 $\pm$ 8.9     | 83 $\pm$ 3.8                  |
|                                                    | DOTH/DINCH       | 110 $\pm$ 2.1              | 110 $\pm$ 4.2   | 100 $\pm$ 3.1   | 99 $\pm$ 4.2    | 97 $\pm$ 9.5    | 92 $\pm$ 1.6     | 88 $\pm$ 1.4 <sup>2)</sup>    |
|                                                    | DOTH/DL9TH       | 110 $\pm$ 1.0              | 100 $\pm$ 3.0   | 98 $\pm$ 3.3    | 94 $\pm$ 3.6    | 93 $\pm$ 3.5    | 88 $\pm$ 2.4     | 86 $\pm$ 2.1                  |
| Chloride (mEq/L)                                   | DEHP             | 77 $\pm$ 1.5               | 78 $\pm$ 1.2    | 75 $\pm$ 1.0    | 73 $\pm$ 4.2    | 75 $\pm$ 3.1    | 77 $\pm$ 0.75    | 77 $\pm$ 1.5                  |
|                                                    | DOTH/DINCH       | 77 $\pm$ 1.0               | 78 $\pm$ 1.2    | 76 $\pm$ 1.2    | 75 $\pm$ 1.9    | 76 $\pm$ 2.9    | 76 $\pm$ 1.8     | 77 $\pm$ 1.3                  |
|                                                    | DOTH/DL9TH       | 77 $\pm$ 1.5               | 78 $\pm$ 1.9    | 77 $\pm$ 1.0    | 76 $\pm$ 1.7    | 75 $\pm$ 3.0    | 77 $\pm$ 0.84    | 77 $\pm$ 1.3                  |

(Continued)



Table 2. (Continued)

| Indices            | Blood containers | 0 week     | 1 week    | 2 week    | 3 week    | 4 week    | 5 week    | 6 week                  |
|--------------------|------------------|------------|-----------|-----------|-----------|-----------|-----------|-------------------------|
| Potassium (mEq/L)  | DEHP             | 6.2 ± 1.8  | 20 ± 2.9  | 29 ± 4.9  | 31 ± 7.3  | 38 ± 9.8  | 45 ± 4.9  | 46 ± 6.8                |
|                    | DOTH/DINCH       | 5.8 ± 0.80 | 19 ± 4.0  | 26 ± 1.2  | 30 ± 6.1  | 37 ± 4.7  | 39 ± 5.6  | 43 ± 2.4                |
|                    | DOTH/DL9TH       | 6.7 ± 1.6  | 21 ± 3.3  | 30 ± 3.2  | 37 ± 3.5  | 35 ± 11   | 44 ± 6.4  | 47 ± 4.2                |
| Calcium (µg/dL)    | DEHP             | 600 ± 140  | 600 ± 110 | 630 ± 140 | 530 ± 240 | 700 ± 150 | 700 ± 180 | 730 ± 180               |
|                    | DOTH/DINCH       | 650 ± 200  | 630 ± 200 | 700 ± 270 | 830 ± 290 | 630 ± 140 | 720 ± 370 | 750 ± 270               |
|                    | DOTH/DL9TH       | 600 ± 60   | 600 ± 60  | 580 ± 80  | 630 ± 100 | 550 ± 280 | 670 ± 200 | 650 ± 210               |
| Phosphorus (mg/dL) | DEHP             | 14 ± 1.3   | 15 ± 1.2  | 19 ± 1.1  | 19 ± 4.3  | 21 ± 1.2  | 22 ± 1.3  | 23 ± 0.75               |
|                    | DOTH/DINCH       | 14 ± 1.0   | 15 ± 0.70 | 18 ± 0.74 | 19 ± 0.85 | 18 ± 5.4  | 20 ± 2.6  | 21 ± 0.84 <sup>2)</sup> |
|                    | DOTH/DL9TH       | 14 ± 1.6   | 14 ± 1.1  | 18 ± 0.94 | 20 ± 1.2  | 18 ± 3.7  | 21 ± 2.1  | 21 ± 1.1 <sup>3)</sup>  |
| Magnesium (µg/dL)  | DEHP             | 180 ± 80   | 320 ± 40  | 300 ± 60  | 450 ± 100 | 480 ± 130 | 530 ± 150 | 530 ± 80                |
|                    | DOTH/DINCH       | 180 ± 80   | 320 ± 80  | 370 ± 80  | 450 ± 50  | 500 ± 200 | 520 ± 130 | 570 ± 140               |
|                    | DOTH/DL9TH       | 220 ± 120  | 280 ± 80  | 350 ± 80  | 420 ± 40  | 470 ± 80  | 480 ± 100 | 480 ± 120               |

<sup>1)</sup>Data are reported as mean ± SD (n = 6);

<sup>2)</sup>p < 0.05 vs. the DEHP group;

<sup>3)</sup>p < 0.01 vs. the DEHP group;

<sup>4)</sup>nd: not detected

<https://doi.org/10.1371/journal.pone.0185737.t002>

only 1.59-fold higher than those determined in the DEHP blood container at 6 weeks after processing. We previously determined that the no-observed-adverse-effect level (NOAEL) of DOTH is 300 mg/kg body weight/day, using male rats in a 90-day oral repeat dose toxicity study [18]. The NOAEL of DINCH in male rats in an equivalent study was reported to be 107 mg/kg body weight/day [25]. A 13-week oral repeat dose toxicity study reported that the NOAEL of DEHP in male rats was 3.7 mg/kg body weight/day, although the exact NOAEL of DEHP remains controversial [26, 27]. Considering the improved safety of DOTH and DINCH in comparison with that of DEHP, the observed 1.59-fold increase in plasticizer levels is believed to be sufficiently low to avoid adverse effects in patients. We previously determined that the NOAEL of DL9TH is 717 mg/kg body weight/day in male rats, in a 90-day oral repeat dose toxicity study [19]. Therefore, similar plasticizer exposure levels between DEHP and DOTH/DL9TH blood containers indicates that the DOTH/DL9TH blood containers are safer for use than the DEHP blood container.

Hemolysis test results demonstrated that the hemolytic ratio of MAP/RCC did not significantly differ between the analyzed blood containers, suggesting that the hemolysis suppression in DOTH/DINCH and DOTH/DL9TH blood containers is not inferior to that of DEHP blood container. The hemolysis rate in this study tended to be higher than in other studies [16, 17], despite the higher hemolysis suppression effect of MAP solution compared to that of SAGM solution [28]. In this study, MAP/RCC was not leukoreduced, and the hemolysis rate was evaluated by a simplified method. These may be the causes for the high hemolysis rate, and conventional data for pharmaceutical application should be acquired separately. Currently, effective additive solutions are either available or are under development [13]. Therefore, the use of superior additive solutions to the MAP solution also improves the hemolysis rate of the RCC stored in DOTH/DINCH-PVC and DOTH/DL9TH-PVC bags. In this study, we mixed the stored MAP/RCC weekly upon sampling, and mixing during storage was reported to reduce the hemolysis of red blood cells [16, 29, 30]. Determining the extent to which mixing affected the hemolysis in our experiments is a subject for future analysis. However, all blood containers were analyzed at the same experimental conditions. Thus, we consider that the red

blood cell preservation ability of blood containers was adequately compared by this pilot study.

In hematological and blood chemical analyses, we observed significant differences between groups in MCV and MCH levels, and these indices were shown to be higher in the DEHP group compared with those in the other analyzed groups. However, the initial values (at week 0) determined in the DEHP group were higher than those in the other groups. Additionally, MCV and MCH levels remained relatively stable with time, and within physiological range in all groups. This demonstrates that the observed significant differences in MCV and MCH were due to the different initial values between the groups, and that DOTH/DINCH and DOTH/TL9TH blood containers did not negatively affect MCV and MCH levels. We also observed significantly higher albumin, albumin/globulin ratio, and sodium levels in the DOTH/DINCH, and lower phosphorus in the DOTH/DINCH and DOTH/DL9TH groups than in the DEHP group at 6 weeks. High albumin, albumin/globulin ratio, and sodium, and low phosphorus in MAP/RCC do not mean low quality of stored red blood cells. Rather, these differences may indicate improved quality of red blood cells stored in the DOTH/DINCH and DOTH/DL9TH blood containers than those in the DEHP container, because a decrease in sodium and an increase in potassium and phosphorus levels are generally observed during storage. The glucose level of the DOTH/DL9TH group tended to be lower than that of the DEHP group, especially at 4–6 weeks, although no significant difference was found between the groups. Other indices such as ATP concentration were almost similar between the DOTH/DL9TH and DEHP groups, suggesting that the slight decrease in glucose concentration was not severe enough to deteriorate the quality of the stored RCC. In addition, until 3 weeks (the expiration date in Japan), the glucose level remained nearly the same between the groups. Furthermore, the osmotic fragility of stored MAP/RCC did not significantly differ between different groups, showing that the quality of MAP/RCC stored in the DOTH/DINCH and DOTH/TL9TH blood containers was not inferior to that of MAP/RCC stored in the DEHP blood container.

In conclusion, the data presented here demonstrates that DOTH/DINCH and DOTH/DL9TH blood containers represent suitable candidates for the replacement of DEHP blood containers, since they show improved safety and similar quality and total plasticizer exposure, compared with the DEHP blood containers. Considering that DOTH/DL9TH-PVC shows greater flexibility at lower temperatures than DOTH/DINCH-PVC [19], the DOTH/DL9TH-blood container is more promising. Currently, our group is also evaluating the quality of RCC samples stored in SAGM solution, an additive used worldwide. A pivotal study using pooled RCC, quadruple blood bag systems with filters for the selective removal of leukocytes, and a conventional method for the evaluation of hemolysis will be performed for pharmaceutical application.

## Supporting information

**S1 Table. Retention times, precursor ions (Q1), product ions (Q2), collision energies, LODs, and LOQs of the target chemicals.** <sup>1</sup>Calculated using TOCO software, version 2.0 (FUMI theory). The values shown correspond to the concentration in the injected solution; <sup>2</sup>Internal standard. (DOCX)

## Acknowledgments

We thank Shinji Sone, Sara Aida, Yutaka Nagura, Yuko Mishima, and Ryoko Sawada for supporting blood collection.

## Author Contributions

**Conceptualization:** Yuji Haishima.

**Data curation:** Yuki Morishita, Yusuke Nomura, Yuji Haishima.

**Formal analysis:** Yuji Haishima.

**Funding acquisition:** Yuji Haishima.

**Investigation:** Yuki Morishita, Yusuke Nomura, Chie Fukui, Tsuyoshi Kawakami, Toshiyuki Ikeda, Tomokazu Mukai, Toshiyasu Yuba, Ken-ichi Inamura, Hisatoki Yamaoka, Ken-ichi Miyazaki, Hitoshi Okazaki.

**Methodology:** Hitoshi Okazaki, Yuji Haishima.

**Project administration:** Yuji Haishima.

**Resources:** Tomokazu Mukai, Toshiyasu Yuba, Ken-ichi Inamura, Hisatoki Yamaoka, Ken-ichi Miyazaki.

**Supervision:** Yuji Haishima.

**Validation:** Yuji Haishima.

**Visualization:** Yuki Morishita, Yusuke Nomura.

**Writing – original draft:** Yuki Morishita, Yusuke Nomura, Yuji Haishima.

**Writing – review & editing:** Yuki Morishita, Yusuke Nomura, Chie Fukui, Tsuyoshi Kawakami, Toshiyuki Ikeda, Tomokazu Mukai, Toshiyasu Yuba, Ken-ichi Inamura, Hisatoki Yamaoka, Ken-ichi Miyazaki, Hitoshi Okazaki, Yuji Haishima.

## References

1. Prowse CV, de Korte D, Hess JR, van der Meer PF, Biomedical Excellence for Safer Transfusion Collaborative. Commercially available blood storage containers. *Vox Sang*. 2014; 106: 1–13. <https://doi.org/10.1111/vox.12084> PMID: 24102543
2. Tickner JA, Schettler T, Guidotti T, McCally M, Rossi M. Health risks posed by use of Di-2-ethylhexyl phthalate (DEHP) in PVC medical devices: a critical review. *Am J Ind Med*. 2001; 39: 100–111. PMID: 11148020
3. Sampson J, de Korte D. DEHP-plasticised PVC: relevance to blood services. *Transfus Med*. 2011; 21: 73–83. <https://doi.org/10.1111/j.1365-3148.2010.01056.x> PMID: 21143327
4. Scientific Committee on Emerging and Newly-Identified Health Risks (SCENIHR). Final Opinion on the safety of medical devices containing DEHP- plasticized PVC or other plasticizers on neonates and other groups possibly at risk (2015 update), revision February 2016. [https://ec.europa.eu/health/sites/health/files/scientific\\_committees/emerging/docs/scenihr\\_o\\_047.pdf](https://ec.europa.eu/health/sites/health/files/scientific_committees/emerging/docs/scenihr_o_047.pdf). Last accessed: August 14, 2017.
5. Akingbemi BT, Ge R, Klinefelter GR, Zirkin BR, Hardy MP. Phthalate-induced Leydig cell hyperplasia is associated with multiple endocrine disturbances. *Proc Natl Acad Sci U S A*. 2004; 101: 775–780. <https://doi.org/10.1073/pnas.0305977101> PMID: 14715905
6. Lamb JC, Chapin RE, Teague J, Lawton AD, Reel JR. Reproductive effects of four phthalic acid esters in the mouse. *Toxicol Appl Pharmacol*. 1987; 88: 255–269. PMID: 3564043
7. Tyl RW, Price CJ, Marr MC, Kimmel CA. Developmental toxicity evaluation of dietary di(2-ethylhexyl) phthalate in Fischer 344 rats and CD-1 mice. *Fundam Appl Toxicol*. 1988; 10: 395–412. PMID: 3371580
8. Latini G, De Felice C, Presta G, Del Vecchio A, Paris I, Ruggieri F, et al. In utero exposure to di-(2-ethylhexyl)phthalate and duration of human pregnancy. *Environ Health Perspect*. 2003; 111: 1783–1785. PMID: 14594632
9. Meeker JD, Calafat AM, Hauser R. Di(2-ethylhexyl) phthalate metabolites may alter thyroid hormone levels in men. *Environ Health Perspect*. 2007; 115: 1029–1034. <https://doi.org/10.1289/ehp.9852> PMID: 17637918

10. European Parliament and the Council of the European Union. Regulation (EC) No. 1907/2006 of the European Parliament and of the Council. 2006.
11. Article L5214-1 of the French Public Health Code. 2012, amended 2016.
12. US Food and Drug Administration. Public Health Notification on PVC Devices Containing the Plasticizer DEHP. 2002.
13. Simmchen J, Ventura R, Segura J. Progress in the removal of di-[2-ethylhexyl]-phthalate as plasticizer in blood bags. *Transfus Med Rev*. 2012; 26: 27–37. <https://doi.org/10.1016/j.tmr.2011.06.001> PMID: 21820855
14. AuBuchon JP, Estep TN, Davey RJ. The effect of the plasticizer di-2-ethylhexyl phthalate on the survival of stored RBCs. *Blood*. 1988; 71: 448–452. PMID: 3337906
15. Haishima Y, Kawakami T, Hasegawa C, Tanoue A, Yuba T, Isama K, et al. Screening study on hemolysis suppression effect of an alternative plasticizer for the development of a novel blood container made of polyvinyl chloride. *J Biomed Mater Res B Appl Biomater*. 2014; 102: 721–728. <https://doi.org/10.1002/jbm.b.33052> PMID: 24155207
16. Dumont LJ, Baker S, Dumont DF, Herschel L, Waters S, Calcagni K, et al. Exploratory in vitro study of red blood cell storage containers formulated with an alternative plasticizer. *Transfusion*. 2012; 52: 1439–1445. <https://doi.org/10.1111/j.1537-2995.2011.03506.x> PMID: 22211692
17. Lagerberg JW, Gouwerok E, Vlaar R, Go M, de Korte D. In vitro evaluation of the quality of blood products collected and stored in systems completely free of di(2-ethylhexyl)phthalate-plasticized materials. *Transfusion*. 2015; 55: 522–531. <https://doi.org/10.1111/trf.12870> PMID: 25331824
18. Haishima Y, Kawakami T, Fukui C, et al. Characterization of Alternative Plasticizers in Poly(vinylchloride) Sheets for Blood Containers. *J Vinyl Addit Technol* 2016; 22:520–8.
19. Morishita Y, Nomura Y, Fukui C, Fujisawa A, Watanabe K, Fujimaki H, et al. Alternative plasticizer, 4-cyclohexene-1,2-dicarboxylic acid dinonyl ester, for blood containers with protective effects on red blood cells and improved cold resistance. *J Biomed Mater Res B Appl Biomater*. 2017. Forthcoming.
20. Hayashi Y, Matsuda R, Haishima Y, Yagami T, Nakamura A. Validation of HPLC and GC-MS systems for bisphenol-A leached from hemodialyzers on the basis of FUMI theory. *J Pharm Biomed Anal*. 2002; 28: 421–429. PMID: 12008120
21. Haishima Y, Matsuda R, Hayashi Y, Hasegawa C, Yagami T, Tsuchiya T. Risk assessment of di(2-ethylhexyl)phthalate released from PVC blood circuits during hemodialysis and pump-oxygenation therapy. *Int J Pharm*. 2004; 274: 119–129. <https://doi.org/10.1016/j.ijpharm.2004.01.009> PMID: 15072788
22. Haishima Y, Seshimo F, Higuchi T, Yamazaki H, Hasegawa C, Izumi S, et al. Development of a simple method for predicting the levels of di(2-ethylhexyl) phthalate migrated from PVC medical devices into pharmaceutical solutions. *Int J Pharm*. 2005; 298: 126–142. <https://doi.org/10.1016/j.ijpharm.2005.04.009> PMID: 15916874
23. Ito R, Seshimo F, Haishima Y, Hasegawa C, Isama K, Yagami T, et al. Reducing the migration of di-2-ethylhexyl phthalate from polyvinyl chloride medical devices. *Int J Pharm*. 2005; 303: 104–112. <https://doi.org/10.1016/j.ijpharm.2005.07.009> PMID: 16139451
24. Kawakami T, Isama K, Matsuoka A. Analysis of phthalic acid diesters, monoester, and other plasticizers in polyvinyl chloride household products in Japan. *J Environ Sci Health A Tox Hazard Subst Environ Eng*. 2011; 46: 855–864. <https://doi.org/10.1080/10934529.2011.579870> PMID: 21714626
25. National Industrial Chemicals Notification and Assessment Scheme (NICNAS). Full Public Report. File No: STD/1259. 2008.
26. Agency for Toxic Substances and Disease Registry. Toxicological Profile for Di(2-ethylhexyl)phthalate (DEHP); 2002.
27. Poon R, Lecavalier P, Mueller R, Valli VE, Procter BG, Chu I. Subchronic oral toxicity of di-n-octyl phthalate and di(2-Ethylhexyl) phthalate in the rat. *Food Chem Toxicol*. 1997; 35: 225–239. PMID: 9146736
28. Sasakawa S, Shiba M, Mura T, Nakajima T, Suzuki Y, Maeda N. Development of additive solution MAP for storage of red cell concentrates. *Jpn J Transfus Med*. 1991; 37(3): 398–403.
29. Hogman CF, de Verdier CH, Ericson A, Eriksson L, Sandhagen B. Studies on the mechanism of human red cell loss of viability during storage at +4 degrees C in vitro. III. Effects of mixing during storage. *Vox Sang*. 1987; 53: 84–88. PMID: 3686939
30. Hogman CF, Eriksson L, Ericson A, Reppucci AJ. Storage of saline-adenine-glucose-mannitol-suspended red cells in a new plastic container: polyvinylchloride plasticized with butyryl-n-trihexyl-citrate. *Transfusion*. 1991; 31: 26–29. PMID: 1898784
